# Supplementary material
Source: MDPI journal article supplement (https://www.mdpi.com/2073-4352/13/2/180)
Supplement: s1 [file s1]

# Supplementary Materials for High $pO_2$ Flux Growth and Characterization of $NdNiO_3$ Crystals

Xiaoli Wang <sup>1</sup>, Shilei Wang <sup>1</sup>, Chao Liu <sup>1</sup>, Chuanyan Fan <sup>1</sup>, Lu Han <sup>1</sup>, Feiyu Li <sup>1</sup>, Tieyan Chang <sup>2</sup>, Yu-Sheng Chen <sup>2</sup>, Shanpeng Wang <sup>1</sup>, Xutang Tao <sup>1,\*</sup> and Junjie Zhang <sup>1,\*</sup>

<sup>1</sup> State Key Laboratory of Crystal Materials, Shandong University, Jinan 250100, China

<sup>2</sup> NSF's ChemMatCARS, The University of Chicago, Argonne, IL 60439, USA

\* Correspondence: txt@sdu.edu.cn (X.T.); junjie@sdu.edu.cn (J.Z.)

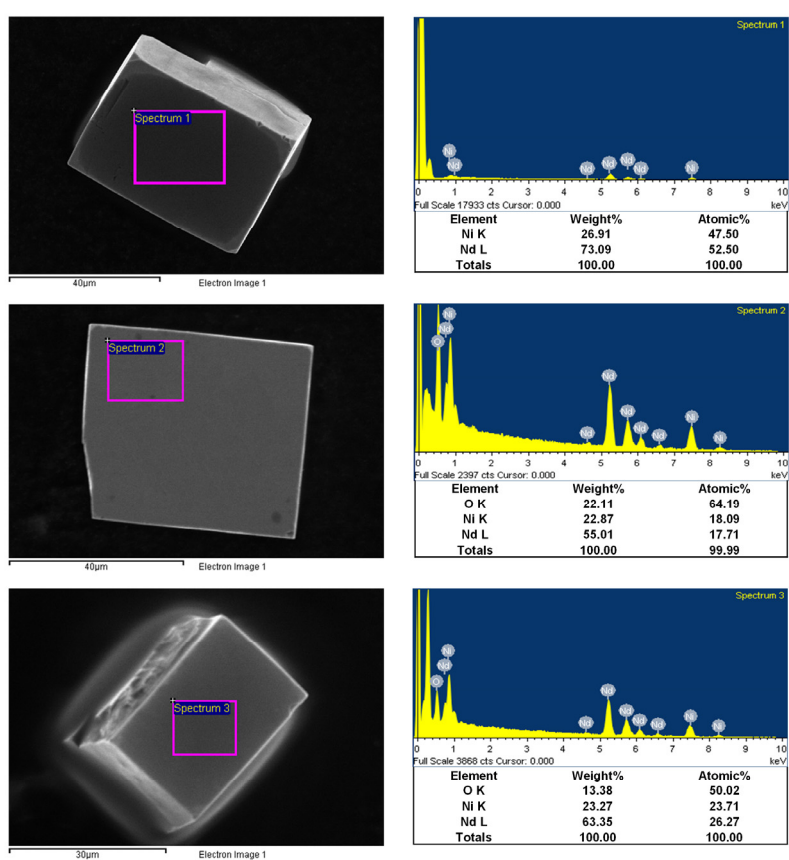

**Figure S1.** Elemental analysis for as-grown  $NdNiO_3$  crystals.

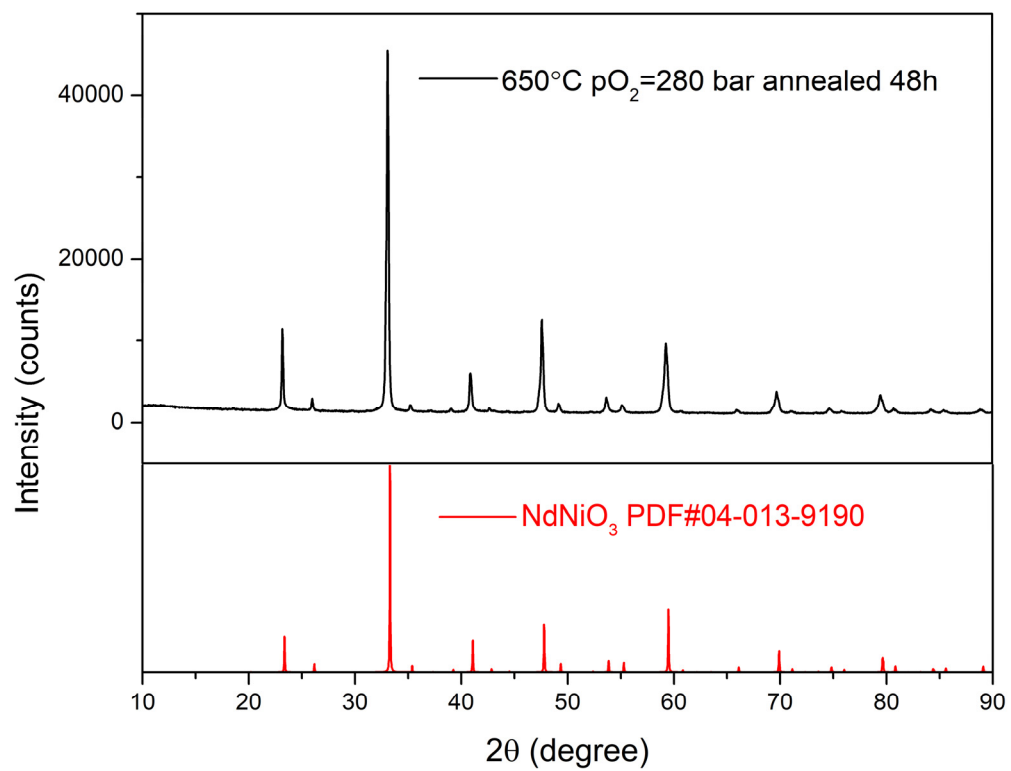

**Figure S2.** In-house X-ray powder diffraction for annealed NdNiO<sub>3</sub> sample.

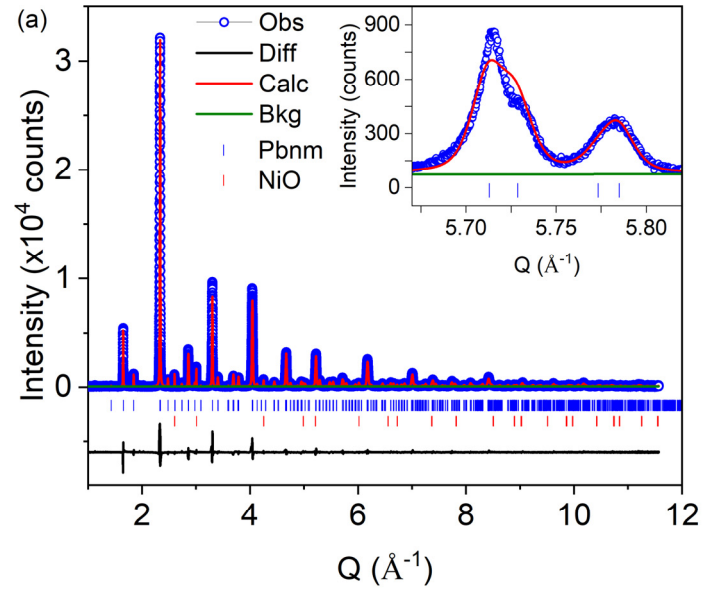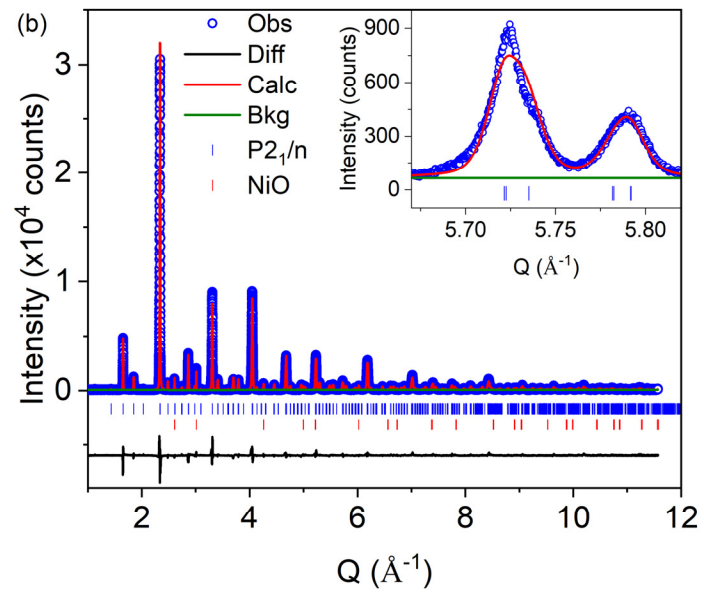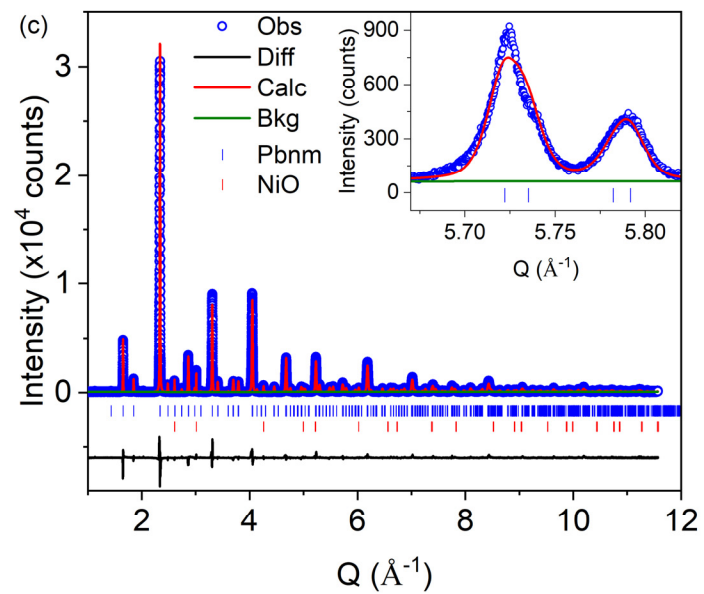

**Figure S3.** (a) Synchrotron x-ray high-resolution powder diffraction pattern for as-grown NdNiO<sub>3</sub> at 295 K with Rietveld refinement using the orthorhombic *Pbnm* symmetry; (b) Synchrotron x-ray high-resolution powder diffraction pattern for NdNiO<sub>3</sub> at 100 K with Rietveld refinement using the monoclinic *P2<sub>1</sub>/n* symmetry; (c) Synchrotron x-ray high-resolution powder diffraction pattern for NdNiO<sub>3</sub> at 100 K with Rietveld refinement using the orthorhombic *Pbnm* symmetry. Insets are observed and calculated intensities in the Q range of 5.67-5.82 Å<sup>-1</sup>, corresponding to the orthorhombic (404)/(044)/(423)/(243) region (from left to right) or the monoclinic (40 $\bar{4}$ )/(404)/(044)/ (42 $\bar{3}$ )/(423)/(24 $\bar{3}$ )/(243) region (from left to right). The X-axis Q is  $Q=2\pi/d=4\pi\sin\theta/\lambda$ , where d is the d-spacing,  $\lambda$  is wavelength. Obs: observed intensity; Diff: difference; Calc: calculated intensity; Bkg: background.

**Table S1.** Unit cell parameters and atomic coordinates for NdNiO<sub>3</sub> at 300 K as obtained from Rietveld refinement to an in-house X-ray powder diffraction pattern.

|                                                                                     |              |                          |          |       |                            |
|-------------------------------------------------------------------------------------|--------------|--------------------------|----------|-------|----------------------------|
| Chemical formula: NdNiO <sub>3</sub>                                                |              |                          |          |       |                            |
| Source: X-ray powder diffraction, instrument: Bruker D2, $\lambda=1.5418$ Å         |              |                          |          |       |                            |
| Formular weight (g/mol)                                                             | 250.9315     |                          |          |       |                            |
| Temperature (K)                                                                     | 300          | Fit reliability factors  |          |       |                            |
| Crystal system                                                                      | Orthorhombic | $R_p$                    |          | 4.16% |                            |
| Space group                                                                         | <i>Pbnm</i>  | $R_{wp}$                 |          | 6.52% |                            |
| $a$ (Å)                                                                             | 5.4019(3)    | $R_{Bragg}$              |          | 4.39% |                            |
| $b$ (Å)                                                                             | 5.3697(3)    | Goodness-of-fit $\chi^2$ |          | 3.26  |                            |
| $c$ (Å)                                                                             | 7.6009(5)    |                          |          |       |                            |
| Unit cell vol. $V$ (Å <sup>3</sup> )                                                | 220.48(2)    |                          |          |       |                            |
| $Z$                                                                                 | 4            |                          |          |       |                            |
| Density (g/cm <sup>3</sup> )                                                        | 7.5596(8)    |                          |          |       |                            |
| Starting model of NdNiO <sub>3</sub> was from the PDF4+ database (ID: 04-006-7145). |              |                          |          |       |                            |
| Atomic positions                                                                    | $x$          | $y$                      | $z$      | s.o.f | $B_{eq}$ (Å <sup>2</sup> ) |
| Nd                                                                                  | 0.9919(8)    | 0.0296(3)                | 0.25     | 1     | 0.61                       |
| Ni                                                                                  | 0.5000       | 0                        | 0        | 1     | 0.51                       |
| O1                                                                                  | 0.027(7)     | 0.492(3)                 | 0.25     | 1     | 0.76                       |
| O2                                                                                  | 0.671(2)     | 0.266(3)                 | 0.016(3) | 1     | 0.88                       |

**Table S2.** Unit cell parameters and atomic coordinates for NdNiO<sub>3</sub> at 295 K as obtained from Rietveld refinement to a synchrotron X-ray high-resolution powder diffraction pattern.

|                                                                                                                                         |              |                          |           |        |                            |
|-----------------------------------------------------------------------------------------------------------------------------------------|--------------|--------------------------|-----------|--------|----------------------------|
| Chemical formula: NdNiO <sub>3</sub>                                                                                                    |              |                          |           |        |                            |
| Source: Synchrotron X-ray high-resolution powder diffraction, instrument: 11-BM, APS, $\lambda=0.458961$ Å                              |              |                          |           |        |                            |
| Formular weight (g/mol)                                                                                                                 | 250.9315     |                          |           |        |                            |
| Temperature (K)                                                                                                                         | 295          | Fit reliability factors  |           |        |                            |
| Crystal system                                                                                                                          | Orthorhombic | $R_p$                    |           | 10.69% |                            |
| Space group                                                                                                                             | <i>Pbnm</i>  | $R_{wp}$                 |           | 14.88% |                            |
| $a$ (Å)                                                                                                                                 | 5.39347(7)   | $R_{Bragg}$              |           | 4.515% |                            |
| $b$ (Å)                                                                                                                                 | 5.37116(6)   | Goodness-of-fit $\chi^2$ |           | 2.34   |                            |
| $c$ (Å)                                                                                                                                 | 7.60367(10)  |                          |           |        |                            |
| Unit cell vol. V (Å <sup>3</sup> )                                                                                                      | 220.272(5)   |                          |           |        |                            |
| Z                                                                                                                                       | 4            |                          |           |        |                            |
| Density (g/cm <sup>3</sup> )                                                                                                            | 7.56668(17)  |                          |           |        |                            |
| Starting model of NdNiO <sub>3</sub> was from the PDF4+ database (ID: 04-006-7145).<br>Phase fraction: 96.01(4)%wt.                     |              |                          |           |        |                            |
| Atomic positions                                                                                                                        | x            | y                        | z         | s.o.f  | $B_{eq}$ (Å <sup>2</sup> ) |
| Nd                                                                                                                                      | 0.99558(14)  | 0.03169(5)               | 0.25      | 1      | 0.310(6)                   |
| Ni                                                                                                                                      | 0.5000       | 0                        | 0         | 1      | 0.200(9)                   |
| O1                                                                                                                                      | 0.0525(10)   | 0.4914(6)                | 0.25      | 1      | 0.20(13)                   |
| O2                                                                                                                                      | 0.7068(8)    | 0.2776(8)                | 0.0394(6) | 1      | 0.29(7)                    |
|                                                                                                                                         |              |                          |           |        |                            |
| Starting model of NiO was from the PDF4+ database (ID: 04-013-0889) and atomic coordinates were not refined. Phase fraction: 3.99(4)%wt |              |                          |           |        |                            |
| Space group                                                                                                                             | $R\bar{3}m$  |                          |           |        |                            |
| $a$ (Å)                                                                                                                                 | 2.95592(5)   |                          |           |        |                            |
| $c$ (Å)                                                                                                                                 | 7.2305(2)    |                          |           |        |                            |
| Atomic positions                                                                                                                        | $x$          | $y$                      | $z$       | s.o.f  | $B_{eq}$ (Å <sup>2</sup> ) |
| Ni                                                                                                                                      | 0            | 0                        | 0         | 1      | 0.14                       |
| O                                                                                                                                       | 0            | 0                        | 0.5       | 1      | 0.18                       |

**Table S3.** Unit cell parameters and atomic coordinates for NdNiO<sub>3</sub> at 100 K as obtained from Rietveld refinement (using *Pbnm*) to a synchrotron X-ray high-resolution powder diffraction pattern.

|                                                                                                                                             |              |                          |           |        |                            |
|---------------------------------------------------------------------------------------------------------------------------------------------|--------------|--------------------------|-----------|--------|----------------------------|
| Chemical formula: NdNiO <sub>3</sub>                                                                                                        |              |                          |           |        |                            |
| Source: Synchrotron X-ray high-resolution powder diffraction, instrument: 11-BM, APS, $\lambda = 0.458956$ Å                                |              |                          |           |        |                            |
| Formular weight (g/mol)                                                                                                                     | 250.9315     |                          |           |        |                            |
| Temperature (K)                                                                                                                             | 100          | Fit reliability factors  |           |        |                            |
| Crystal system                                                                                                                              | Orthorhombic | $R_p$                    |           | 11.80% |                            |
| Space group                                                                                                                                 | <i>Pbnm</i>  | $R_{wp}$                 |           | 16.25% |                            |
| $a$ (Å)                                                                                                                                     | 5.38439(8)   | $R_{Bragg}$              |           | 6.630% |                            |
| $b$ (Å)                                                                                                                                     | 5.36601(6)   | Goodness-of-fit $\chi^2$ |           | 2.52   |                            |
| $c$ (Å)                                                                                                                                     | 7.59296(12)  |                          |           |        |                            |
| Unit cell vol. V (Å <sup>3</sup> )                                                                                                          | 219.381(5)   |                          |           |        |                            |
| Z                                                                                                                                           | 4            |                          |           |        |                            |
| Density (g/cm <sup>3</sup> )                                                                                                                | 7.59741(19)  |                          |           |        |                            |
| Starting model of NdNiO <sub>3</sub> was from the PDF4+ database (ID: 04-006-7145).<br>Phase fraction: 95.78(4)%wt.                         |              |                          |           |        |                            |
| Atomic positions                                                                                                                            | x            | y                        | z         | s.o.f  | $B_{eq}$ (Å <sup>2</sup> ) |
| Nd                                                                                                                                          | 0.9973(2)    | 0.03332(6)               | 0.25      | 1      | 0.200(6)                   |
| Ni                                                                                                                                          | 0.5000       | 0                        | 0         | 1      | 0.200(9)                   |
| O1                                                                                                                                          | 0.0567(12)   | 0.4909(7)                | 0.25      | 1      | 0.20(14)                   |
| O2                                                                                                                                          | 0.7126(9)    | 0.2780(9)                | 0.0407(6) | 1      | 0.20(7)                    |
|                                                                                                                                             |              |                          |           |        |                            |
| Starting model of NiO was from the PDF4+ database (ID: 04-013-0889) and atomic coordinates were not refined.<br>Phase fraction: 4.22(4)%wt. |              |                          |           |        |                            |
| Space group                                                                                                                                 | $R\bar{3}m$  |                          |           |        |                            |
| $a$ (Å)                                                                                                                                     | 2.95194(4)   |                          |           |        |                            |
| $c$ (Å)                                                                                                                                     | 7.21816(18)  |                          |           |        |                            |
| Atomic positions                                                                                                                            | $x$          | $y$                      | $z$       | s.o.f  | $B_{eq}$ (Å <sup>2</sup> ) |
| Ni                                                                                                                                          | 0            | 0                        | 0         | 1      | 0.14                       |
| O                                                                                                                                           | 0            | 0                        | 0.5       | 1      | 0.18                       |

**Table S4.** Unit cell parameters and atomic coordinates for NdNiO<sub>3</sub> at 100 K as obtained from Rietveld refinement (using  $P2_1/n$ ) to a synchrotron X-ray high-resolution powder diffraction pattern.

|                                                                                                                                             |             |                          |            |        |                            |
|---------------------------------------------------------------------------------------------------------------------------------------------|-------------|--------------------------|------------|--------|----------------------------|
| Chemical formula: NdNiO <sub>3</sub>                                                                                                        |             |                          |            |        |                            |
| Source: Synchrotron X-ray high-resolution powder diffraction, instrument: 11-BM, APS, $\lambda = 0.458956$ Å                                |             |                          |            |        |                            |
| Formular weight (g/mol)                                                                                                                     | 250.9315    |                          |            |        |                            |
| Temperature (K)                                                                                                                             | 100         | Fit reliability factors  |            |        |                            |
| Crystal system                                                                                                                              | Monoclinic  | $R_p$                    |            | 11.69% |                            |
| Space group                                                                                                                                 | $P2_1/n$    | $R_{wp}$                 |            | 16.19% |                            |
| $a$ (Å)                                                                                                                                     | 5.38464(8)  | $R_{Bragg}$              |            | 6.302% |                            |
| $b$ (Å)                                                                                                                                     | 5.36604(6)  | Goodness-of-fit $\chi^2$ |            | 2.51   |                            |
| $c$ (Å)                                                                                                                                     | 7.59258(12) |                          |            |        |                            |
| $\beta$ (°)                                                                                                                                 | 90.010(10)  |                          |            |        |                            |
| Unit cell vol. $V$ (Å <sup>3</sup> )                                                                                                        | 219.381(5)  |                          |            |        |                            |
| $Z$                                                                                                                                         | 4           |                          |            |        |                            |
| Density (g/cm <sup>3</sup> )                                                                                                                | 7.59740(19) |                          |            |        |                            |
| Starting model of NdNiO <sub>3</sub> was from the PDF4+ database (ID: 04-016-9612).<br>Phase fraction: 95.79(4)%wt.                         |             |                          |            |        |                            |
| Atomic positions                                                                                                                            | $x$         | $y$                      | $z$        | s.o.f  | $B_{eq}$ (Å <sup>2</sup> ) |
| Nd                                                                                                                                          | 0.9978(2)   | 0.03317(5)               | 0.2498(6)  | 1      | 0.2                        |
| Ni1                                                                                                                                         | 0.5000      | 0                        | 0          | 1      | 0.2                        |
| Ni2                                                                                                                                         | 0.5000      | 0                        | 0.5000     | 1      | 0.2                        |
| O1                                                                                                                                          | 0.0558(17)  | 0.4920(6)                | 0.245(3)   | 1      | 0.2                        |
| O2                                                                                                                                          | 0.684(2)    | 0.266(3)                 | 0.0319(16) | 1      | 0.2                        |
| O3                                                                                                                                          | 0.2360(19)  | 0.215(3)                 | 0.955(2)   | 1      | 0.2                        |
| Starting model of NiO was from the PDF4+ database (ID: 04-013-0889) and atomic coordinates were not refined.<br>Phase fraction: 4.21(4)%wt. |             |                          |            |        |                            |
| Space group                                                                                                                                 | $R\bar{3}m$ |                          |            |        |                            |
| $a$ (Å)                                                                                                                                     | 2.95194(4)  |                          |            |        |                            |
| $c$ (Å)                                                                                                                                     | 7.21808(18) |                          |            |        |                            |
| Atomic positions                                                                                                                            | $x$         | $y$                      | $z$        | s.o.f  | $B_{eq}$ (Å <sup>2</sup> ) |
| Ni                                                                                                                                          | 0           | 0                        | 0          | 1      | 0.14                       |
| O                                                                                                                                           | 0           | 0                        | 0.5        | 1      | 0.18                       |
